# Supplementary material for: The Accuracy of Computerized Adaptive Testing in Heterogeneous Populations: A Mixture Item-Response Theory Analysis
Source: PubMed Central journal article supplement (PMC4773251; doi:10.1371/journal.pone.0150563), 2016-03-01
Supplement: pone.0150563.s001.pdf [file pone.0150563.s001.pdf]

# Supporting Information

S1 Appendix: Item parameters of the latent variable mixture model (3 classes)

| Item | Class 1           |                  |                  |                  |                  | Class 2           |                  |                  |                  |                  | Class 3           |                  |                  |                  |                  |
|------|-------------------|------------------|------------------|------------------|------------------|-------------------|------------------|------------------|------------------|------------------|-------------------|------------------|------------------|------------------|------------------|
|      | $\lambda$<br>(SE) | $\tau_1$<br>(SE) | $\tau_2$<br>(SE) | $\tau_3$<br>(SE) | $\tau_4$<br>(SE) | $\lambda$<br>(SE) | $\tau_1$<br>(SE) | $\tau_2$<br>(SE) | $\tau_3$<br>(SE) | $\tau_4$<br>(SE) | $\lambda$<br>(SE) | $\tau_1$<br>(SE) | $\tau_2$<br>(SE) | $\tau_3$<br>(SE) | $\tau_4$<br>(SE) |
| 1    | 4.3<br>(.45)      | -5.0<br>(.54)    | 0.6<br>(.43)     | 5.3<br>(.59)     |                  | 4.3<br>(.48)      | -7.4<br>(.79)    | -0.4<br>(.38)    | 4.2<br>(.52)     |                  | 5.3<br>(.50)      | -3.3<br>(.49)    | 3.5<br>(.40)     | 7.5<br>(.61)     |                  |
| 2*   | 4.1<br>(.35)      | -5.7<br>(.55)    | -2.2<br>(.41)    | 0.2<br>(.40)     | 4.2<br>(.45)     | 4.0<br>(.40)      | -7.7<br>(.74)    | -3.4<br>(.46)    | -0.7<br>(.36)    | 3.2<br>(.43)     | 4.9<br>(.44)      | -3.9<br>(.49)    | 0.9<br>(.32)     | 3.0<br>(.34)     | 6.7<br>(.52)     |
| 3    | 4.5<br>(.47)      | -3.1<br>(.51)    | 1.3<br>(.40)     | 5.0<br>(.55)     |                  | 4.8<br>(.47)      | -1.4<br>(.44)    | 2.0<br>(.40)     | 5.9<br>(.52)     |                  | 6.3<br>(.53)      | 1.7<br>(.41)     | 5.3<br>(.45)     | 8.4<br>(.60)     |                  |
| 4    | 6.0<br>(.38)      | -5.4<br>(.76)    | 1.2<br>(.51)     | 4.8<br>(.45)     | 9.1<br>(.42)     | 6.1<br>(.48)      | -2.8<br>(.60)    | 2.3<br>(.45)     | 4.9<br>(.44)     | 9.1<br>(.42)     | 6.1<br>(.42)      | 0.4<br>(.38)     | 4.5<br>(.35)     | 6.7<br>(.39)     | 9.1<br>(.42)     |
| 5    | 3.9<br>(.49)      | -2.8<br>(.47)    | 1.5<br>(.42)     | 4.0<br>(.54)     | 6.8<br>(.69)     | 3.4<br>(.43)      | -5.3<br>(.53)    | -0.1<br>(.29)    | 2.2<br>(.31)     | 5.9<br>(.54)     | 3.9<br>(.48)      | 3.1<br>(.45)     | 5.4<br>(.54)     | 7.1<br>(.67)     | 9.6<br>(.08)     |
| 6    | 4.6<br>(.45)      | -4.3<br>(.49)    | 0.5<br>(.43)     | 2.6<br>(.44)     | 5.4<br>(.60)     | 4.7<br>(.55)      | -2.9<br>(.47)    | 0.7<br>(.38)     | 2.9<br>(.45)     | 5.8<br>(.67)     | 5.3<br>(.37)      | 0.1<br>(.34)     | 3.1<br>(.37)     | 4.6<br>(.42)     | 6.5<br>(.47)     |
| 7    | 3.8<br>(.33)      | -2.9<br>(.38)    | -0.2<br>(.36)    | 3.4<br>(.41)     | 7.0<br>(.54)     | 3.5<br>(.32)      | -3.0<br>(.36)    | -0.7<br>(.33)    | 2.4<br>(.35)     | 5.7<br>(.42)     | 3.3<br>(.26)      | 0.9<br>(.23)     | 2.5<br>(.25)     | 4.3<br>(.29)     | 6.8<br>(.45)     |
| 8    | 3.1<br>(.34)      | -1.2<br>(.35)    | 2.3<br>(.37)     | 4.5<br>(.44)     | 8.7<br>(.91)     | 2.1<br>(.27)      | 0.2<br>(.21)     | 2.5<br>(.25)     | 4.1<br>(.31)     | 7.2<br>(.69)     | 2.8<br>(.32)      | 2.9<br>(.32)     | 4.9<br>(.43)     | 6.6<br>(.53)     | 7.4<br>(.64)     |
| 9    | 4.0<br>(.42)      | -2.0<br>(.47)    | 2.4<br>(.43)     | 5.1<br>(.51)     | 8.3<br>(.76)     | 3.7<br>(.38)      | 0.7<br>(.34)     | 3.4<br>(.38)     | 5.2<br>(.48)     | 8.4<br>(.85)     | 4.7<br>(.49)      | 3.3<br>(.45)     | 5.7<br>(.53)     | 7.4<br>(.64)     | 9.2<br>(.74)     |
| 10   | 3.4<br>(.38)      | 0.5<br>(.37)     | 2.4<br>(.39)     | 4.9<br>(.51)     | 7.8<br>(.82)     | 2.2<br>(.35)      | 2.9<br>(.35)     | 4.3<br>(.42)     | 6.5<br>(.64)     | 7.7<br>(.26)     | 4.0<br>(.57)      | 5.0<br>(.56)     | 6.6<br>(.66)     | 8.1<br>(.83)     | 10.0<br>(.20)    |
| 11   | 5.0<br>(.55)      | -0.1<br>(.51)    | 4.3<br>(.61)     | 6.7<br>(.70)     | 10.8<br>(.02)    | 2.1<br>(.28)      | 2.0<br>(.28)     | 4.2<br>(.33)     | 5.5<br>(.43)     | 7.3<br>(.68)     | 4.0<br>(.41)      | 4.0<br>(.43)     | 6.4<br>(.51)     | 7.8<br>(.62)     | 9.3<br>(.77)     |
| 12   | 3.0<br>(.34)      | 1.6<br>(.33)     | 4.1<br>(.42)     | 5.6<br>(.49)     | 8.5<br>(.84)     | 1.9<br>(.28)      | 2.7<br>(.30)     | 4.8<br>(.40)     | 6.0<br>(.59)     | 7.3<br>(.74)     | 2.9<br>(.39)      | 4.5<br>(.46)     | 6.5<br>(.56)     | 7.7<br>(.69)     | 9.1<br>(.03)     |
| 13   | 3.8<br>(.35)      | -0.9<br>(.39)    | 3.0<br>(.42)     | 4.8<br>(.50)     | 7.7<br>(.71)     | 3.0<br>(.34)      | 1.4<br>(.30)     | 3.4<br>(.35)     | 5.3<br>(.45)     | 7.8<br>(.66)     | 3.9<br>(.38)      | 3.3<br>(.37)     | 5.5<br>(.47)     | 7.2<br>(.57)     | 8.4<br>(.68)     |
| 14   | 3.1<br>(.33)      | 0.7<br>(.35)     | 2.9<br>(.40)     | 5.1<br>(.48)     | 7.0<br>(.62)     | 2.0<br>(.35)      | 3.1<br>(.41)     | 4.6<br>(.46)     | 6.6<br>(.64)     | 36.9<br>(.00)    | 3.3<br>(.43)      | 4.8<br>(.52)     | 6.3<br>(.63)     | 7.8<br>(.71)     | 8.9<br>(.85)     |

| Item | Class 1           |                  |                  |                  |                  | Class 2           |                  |                  |                  |                  | Class 3           |                  |                  |                  |                  |
|------|-------------------|------------------|------------------|------------------|------------------|-------------------|------------------|------------------|------------------|------------------|-------------------|------------------|------------------|------------------|------------------|
|      | $\lambda$<br>(SE) | $\tau_1$<br>(SE) | $\tau_2$<br>(SE) | $\tau_3$<br>(SE) | $\tau_4$<br>(SE) | $\lambda$<br>(SE) | $\tau_1$<br>(SE) | $\tau_2$<br>(SE) | $\tau_3$<br>(SE) | $\tau_4$<br>(SE) | $\lambda$<br>(SE) | $\tau_1$<br>(SE) | $\tau_2$<br>(SE) | $\tau_3$<br>(SE) | $\tau_4$<br>(SE) |
| 15   | 2.2<br>(.30)      | 2.2<br>(.33)     | 3.9<br>(.37)     | 6.3<br>(.55)     | 8.0<br>(.06)     | 2.1<br>(.56)      | 5.1<br>(.86)     | 6.6<br>(.03)     | 7.7<br>(.21)     | 36.8<br>(.00)    | 6.4<br>(.41)      | 12.1<br>(.53)    | 13.6<br>(.66)    | 16.3<br>(.08)    | 18.6<br>(.49)    |
| 16   | 3.1<br>(.41)      | -4.1<br>(.51)    | -0.5<br>(.31)    | 0.4<br>(.31)     | 2.2<br>(.41)     | 3.0<br>(.33)      | -2.4<br>(.32)    | -0.5<br>(.27)    | 0.7<br>(.30)     | 2.3<br>(.35)     | 5.1<br>(.47)      | -0.2<br>(.34)    | 1.7<br>(.37)     | 2.4<br>(.39)     | 3.9<br>(.42)     |
| 17   | 3.0<br>(.32)      | 1.0<br>(.38)     | 3.3<br>(.41)     | 5.3<br>(.46)     | 8.1<br>(.73)     | 2.5<br>(.40)      | 4.0<br>(.45)     | 5.2<br>(.51)     | 7.4<br>(.81)     | 42.0<br>(.00)    | 2.7<br>(.40)      | 4.8<br>(.50)     | 6.5<br>(.57)     | 7.3<br>(.68)     | 8.4<br>(.98)     |
| 18   | 3.5<br>(.38)      | -3.2<br>(.40)    | 1.4<br>(.45)     | 3.8<br>(.55)     | 6.9<br>(.72)     | 3.5<br>(.53)      | -6.5<br>(.60)    | -0.3<br>(.30)    | 2.1<br>(.36)     | 5.7<br>(.63)     | 3.8<br>(.35)      | 2.6<br>(.35)     | 5.3<br>(.42)     | 7.2<br>(.54)     | 8.8<br>(.79)     |
| 19   | 4.4<br>(.45)      | -3.2<br>(.53)    | 1.8<br>(.46)     | 4.4<br>(.55)     | 7.8<br>(.75)     | 3.6<br>(.34)      | -0.1<br>(.34)    | 2.4<br>(.34)     | 4.4<br>(.42)     | 7.7<br>(.85)     | 5.5<br>(.52)      | 3.3<br>(.51)     | 5.6<br>(.57)     | 7.3<br>(.64)     | 9.1<br>(.77)     |
| 20   | 2.5<br>(.28)      | 0.4<br>(.30)     | 3.1<br>(.36)     | 5.0<br>(.42)     | 7.7<br>(.85)     | 1.8<br>(.29)      | 2.4<br>(.30)     | 4.1<br>(.37)     | 5.6<br>(.59)     | 36.4<br>(.00)    | 3.6<br>(.69)      | 5.8<br>(.88)     | 7.4<br>(.99)     | 9.8<br>(.77)     | 36.1<br>(.00)    |
| 21   | 4.2<br>(.44)      | -3.9<br>(.50)    | 1.0<br>(.42)     | 3.1<br>(.49)     | 6.2<br>(.71)     | 3.8<br>(.37)      | -1.6<br>(.37)    | 1.4<br>(.32)     | 3.1<br>(.37)     | 6.3<br>(.51)     | 5.6<br>(.40)      | 1.1<br>(.37)     | 4.3<br>(.44)     | 6.0<br>(.51)     | 8.0<br>(.55)     |
| 22   | 3.3<br>(.34)      | -3.4<br>(.41)    | -0.7<br>(.32)    | 0.4<br>(.34)     | 2.4<br>(.39)     | 3.8<br>(.39)      | -2.3<br>(.38)    | 0.1<br>(.33)     | 1.5<br>(.35)     | 3.7<br>(.44)     | 5.0<br>(.37)      | 0.8<br>(.33)     | 2.3<br>(.34)     | 3.0<br>(.36)     | 4.5<br>(.41)     |
| 23   | 2.3<br>(.27)      | 0.5<br>(.24)     | 2.4<br>(.28)     | 4.5<br>(.36)     | 7.4<br>(.03)     | 2.0<br>(.21)      | 2.4<br>(.28)     | 3.4<br>(.30)     | 5.6<br>(.56)     | 33.6<br>(.00)    | 2.1<br>(.17)      | 6.5<br>(.92)     | 7.4<br>(.94)     | 10.0<br>(.59)    | 35.3<br>(.00)    |
| 24   | 1.8<br>(.22)      | -4.2<br>(.53)    | 0.2<br>(.43)     | 4.5<br>(.49)     | 8.4<br>(.73)     | 1.6<br>(.28)      | -0.9<br>(.40)    | 1.2<br>(.40)     | 4.5<br>(.43)     | 7.4<br>(.64)     | 3.5<br>(.68)      | 2.3<br>(.45)     | 4.4<br>(.46)     | 7.1<br>(.59)     | 9.5<br>(.75)     |
| 25   | 4.4<br>(.39)      | -2.8<br>(.31)    | -0.4<br>(.26)    | 1.6<br>(.29)     | 3.8<br>(.37)     | 4.3<br>(.40)      | -1.7<br>(.29)    | 0.1<br>(.27)     | 1.6<br>(.29)     | 3.8<br>(.36)     | 5.8<br>(.49)      | 0.3<br>(.28)     | 1.7<br>(.31)     | 2.9<br>(.33)     | 4.8<br>(.37)     |
| 26   | 2.5<br>(.25)      | -4.2<br>(.45)    | 0.6<br>(.42)     | 3.2<br>(.45)     | 6.7<br>(.61)     | 2.9<br>(.29)      | -2.8<br>(.44)    | 1.0<br>(.42)     | 3.0<br>(.43)     | 6.0<br>(.52)     | 4.0<br>(.31)      | 0.6<br>(.37)     | 3.4<br>(.39)     | 5.3<br>(.44)     | 8.3<br>(.56)     |
| 27   | 4.2<br>(.39)      | -4.2<br>(.42)    | -0.1<br>(.34)    | 1.9<br>(.38)     | 5.0<br>(.51)     | 4.6<br>(.43)      | -3.8<br>(.33)    | -0.5<br>(.25)    | 1.2<br>(.28)     | 3.6<br>(.35)     | 5.5<br>(.39)      | -0.5<br>(.23)    | 1.9<br>(.23)     | 3.4<br>(.28)     | 5.5<br>(.35)     |
| 28   | 3.6<br>(.34)      | -2.6<br>(.37)    | 0.0<br>(.36)     | 3.3<br>(.46)     | 6.6<br>(.59)     | 3.0<br>(.30)      | -4.1<br>(.39)    | -1.3<br>(.27)    | 1.8<br>(.25)     | 5.1<br>(.45)     | 3.4<br>(.22)      | 3.0<br>(.41)     | 5.1<br>(.46)     | 7.7<br>(.70)     | 11.4<br>(.74)    |
| 29   | 3.0<br>(.35)      | -3.1<br>(.38)    | -0.4<br>(.30)    | 2.7<br>(.40)     | 5.2<br>(.51)     | 2.6<br>(.35)      | -3.9<br>(.31)    | -1.3<br>(.21)    | 1.2<br>(.20)     | 3.6<br>(.30)     | 3.8<br>(.39)      | 1.3<br>(.24)     | 3.0<br>(.26)     | 5.2<br>(.37)     | 7.5<br>(.80)     |
| 30   | 2.7<br>(.30)      | -4.9<br>(.61)    | 1.3<br>(.58)     | 5.1<br>(.69)     | 11.5<br>(.17)    | 2.1<br>(.26)      | -2.1<br>(.56)    | 2.4<br>(.53)     | 5.1<br>(.63)     | 9.4<br>(.93)     | 2.7<br>(.26)      | 2.1<br>(.42)     | 5.3<br>(.47)     | 7.4<br>(.59)     | 10.2<br>(.78)    |

| Item | Class 1           |                  |                  |                  |                  | Class 2           |                  |                  |                  |                  | Class 3           |                  |                  |                  |                  |
|------|-------------------|------------------|------------------|------------------|------------------|-------------------|------------------|------------------|------------------|------------------|-------------------|------------------|------------------|------------------|------------------|
|      | $\lambda$<br>(SE) | $\tau_1$<br>(SE) | $\tau_2$<br>(SE) | $\tau_3$<br>(SE) | $\tau_4$<br>(SE) | $\lambda$<br>(SE) | $\tau_1$<br>(SE) | $\tau_2$<br>(SE) | $\tau_3$<br>(SE) | $\tau_4$<br>(SE) | $\lambda$<br>(SE) | $\tau_1$<br>(SE) | $\tau_2$<br>(SE) | $\tau_3$<br>(SE) | $\tau_4$<br>(SE) |
| 31   | 5.9<br>(.57)      | -5.5<br>(.55)    | -1.4<br>(.43)    | 2.6<br>(.46)     | 7.2<br>(.68)     | 6.0<br>(.58)      | -8.1<br>(.13)    | -1.3<br>(.41)    | 2.1<br>(.41)     | 7.0<br>(.66)     | 6.2<br>(.49)      | -3.1<br>(.43)    | 1.8<br>(.31)     | 5.1<br>(.41)     | 8.2<br>(.59)     |
| 32   | 4.5<br>(.43)      | 1.2<br>(.30)     | 2.6<br>(.32)     | 4.2<br>(.38)     | 5.9<br>(.58)     | 4.7<br>(.52)      | 4.0<br>(.51)     | 5.4<br>(.56)     | 6.8<br>(.80)     | 7.7<br>(.30)     | 4.9<br>(.41)      | 4.9<br>(.54)     | 5.7<br>(.57)     | 6.6<br>(.64)     | 7.1<br>(.66)     |
| 33   | 2.3<br>(.25)      | 0.0<br>(.24)     | 1.8<br>(.26)     | 3.9<br>(.35)     | 7.7<br>(.03)     | 2.2<br>(.39)      | 2.0<br>(.29)     | 2.9<br>(.30)     | 5.2<br>(.46)     | 8.3<br>(.45)     | 3.1<br>(.45)      | 4.3<br>(.51)     | 5.9<br>(.55)     | 7.2<br>(.67)     | 8.5<br>(.97)     |
| 34   | 2.1<br>(.23)      | -0.2<br>(.29)    | 1.7<br>(.31)     | 4.2<br>(.40)     | 7.4<br>(.68)     | 2.3<br>(.31)      | 0.4<br>(.27)     | 1.7<br>(.29)     | 4.0<br>(.39)     | 7.8<br>(.63)     | 3.3<br>(.47)      | 3.4<br>(.37)     | 4.6<br>(.39)     | 6.3<br>(.52)     | 9.0<br>(.80)     |
| 35   | 2.6<br>(.28)      | -4.2<br>(.60)    | 6.4<br>(.94)     |                  |                  | 2.8<br>(.35)      | -5.4<br>(.60)    | 4.8<br>(.71)     |                  |                  | 3.2<br>(.34)      | -1.4<br>(.34)    | 6.5<br>(.61)     |                  |                  |
| 36   | 4.6<br>(.65)      | -5.8<br>(.65)    | -0.9<br>(.25)    | 0.5<br>(.26)     | 2.3<br>(.31)     | 4.0<br>(.57)      | -4.9<br>(.40)    | -1.0<br>(.21)    | 0.4<br>(.20)     | 1.5<br>(.22)     | 3.9<br>(.42)      | -2.9<br>(.22)    | 0.7<br>(.16)     | 1.7<br>(.17)     | 2.4<br>(.21)     |

Notes. The parameters are of a mixture graded response model as specified in the MPlus [39] software where the cumulative probability ( $P_{ij}$ ) of an item  $i$  response at or above category  $j$  is expressed as follows (see Sawatzky et al. [34] for details about model specification):

$$P_{ij}(Y \geq j | \theta) = \frac{\exp(-\tau_{ij} + \lambda_i \theta)}{1 + \exp(-\tau_{ij} + \lambda_i \theta)},$$

where  $\tau_{ij}$  denotes the thresholds between the categories of item  $i$ , and  $\lambda_i$  denotes the factor loading for item  $i$ . The following transformation can be applied to convert the Mplus thresholds ( $\tau$ ) and factor loadings ( $\lambda$ ) into the difficulty ( $\beta$ ) and discrimination ( $\alpha$ ) parameters of the grade response model:

$$\beta_{ij} = \frac{\tau_{ij}}{\lambda_i} \text{ and } \alpha_i = \lambda_i.$$

\* Item 2 is the only item with five thresholds. The  $\lambda$  and  $\tau$  estimates for the fifth threshold are 7.4(.62), 6.7(.57) and 10.0(.78) for classes 1, 2 and 3.
